# Supplementary figures and images for: Synthesis and properties of the metal-organic framework Mo3(BTC)2 (TUDMOF-1)
Source: Royal Society of Chemistry journal article supplement (doi:10.1039/b601811d), 2006-01-01

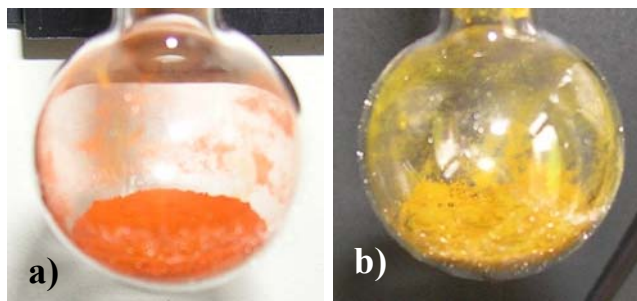

**Fig. S1** Photograph of TUDMOF-1: a) as synthesized, b) activated in vacuum at 413 K.

Supplement: b601811d.pdf [file b601811d.pdf]
